# Supplementary material for: The Effect of Glycine Betaine on Nitrogen and Polyamine Metabolisms, Expression of Glycoside-Related Biosynthetic Enzymes, and K/Na Balance of Stevia under Salt Stress
Source: MDPI journal article supplement (doi:10.3390/plants12081628), 2023-04-12
Supplement: s1 [file s1]

**Table S1.** The primers sequences used in qPCR reactions.

| Gene                                    | Primer sequence 5'→3' (forward/reverse)              | Amplicon length (bp) | Accession No. |
|-----------------------------------------|------------------------------------------------------|----------------------|---------------|
| <i>Actin</i>                            | F: TCGAACACGGTATTGTCAGC<br>R: CTTTCTCTGTTCGCCTTGG    | 143                  | AF548026      |
| <i>Kaurenoic acid hydroxylase (KAH)</i> | F: AGCTTTTCGGCAAGTCTCTG<br>R: CATGGTGACGGCATAATGAG   | 116                  | EU722415      |
| <i>UGT74G1</i>                          | F: TCCTGGATTTCCAGTGCTTC<br>R: GAGACCAAGGGCTCTGTATTTG | 80                   | AY345982      |
| <i>UGT76G1</i>                          | F: AATAGCTCGTGGGTTGGTTG<br>R: ACGTCGAACCCTTGACAAAC   | 77                   | AY345974      |
| <i>UGT85C2</i>                          | F: CAAGAGTTGATGGGAGAAGGAG<br>R: AGCACGGTGATTCCTTGAC  | 137                  | AY345978      |
